# Supplementary material
Source: PubMed Central journal article supplement (PMC3387320)

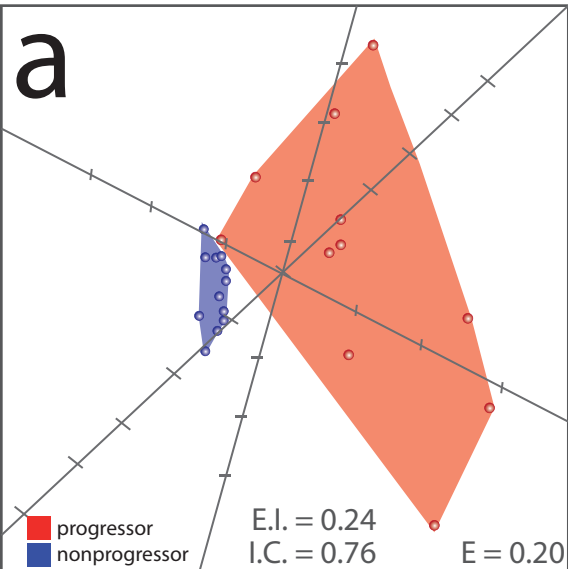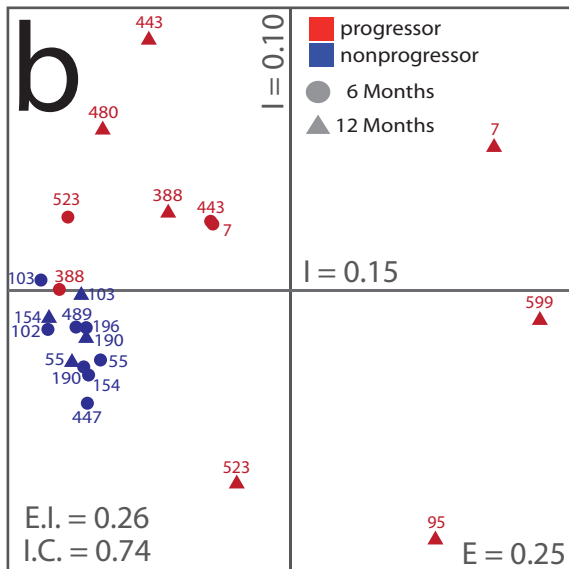

Supplement: NIHMS356260-supplement-Supp_Fig_S2.pdf [file NIHMS356260-supplement-Supp_Fig_S2.pdf]
